# Supplementary material
Source: publisher site journal article supplement (https://www.dovepress.com/article/480101)
Supplement: Supplementary file 1 [file get_supplementary_file.php]

**Supplementary Material**

**
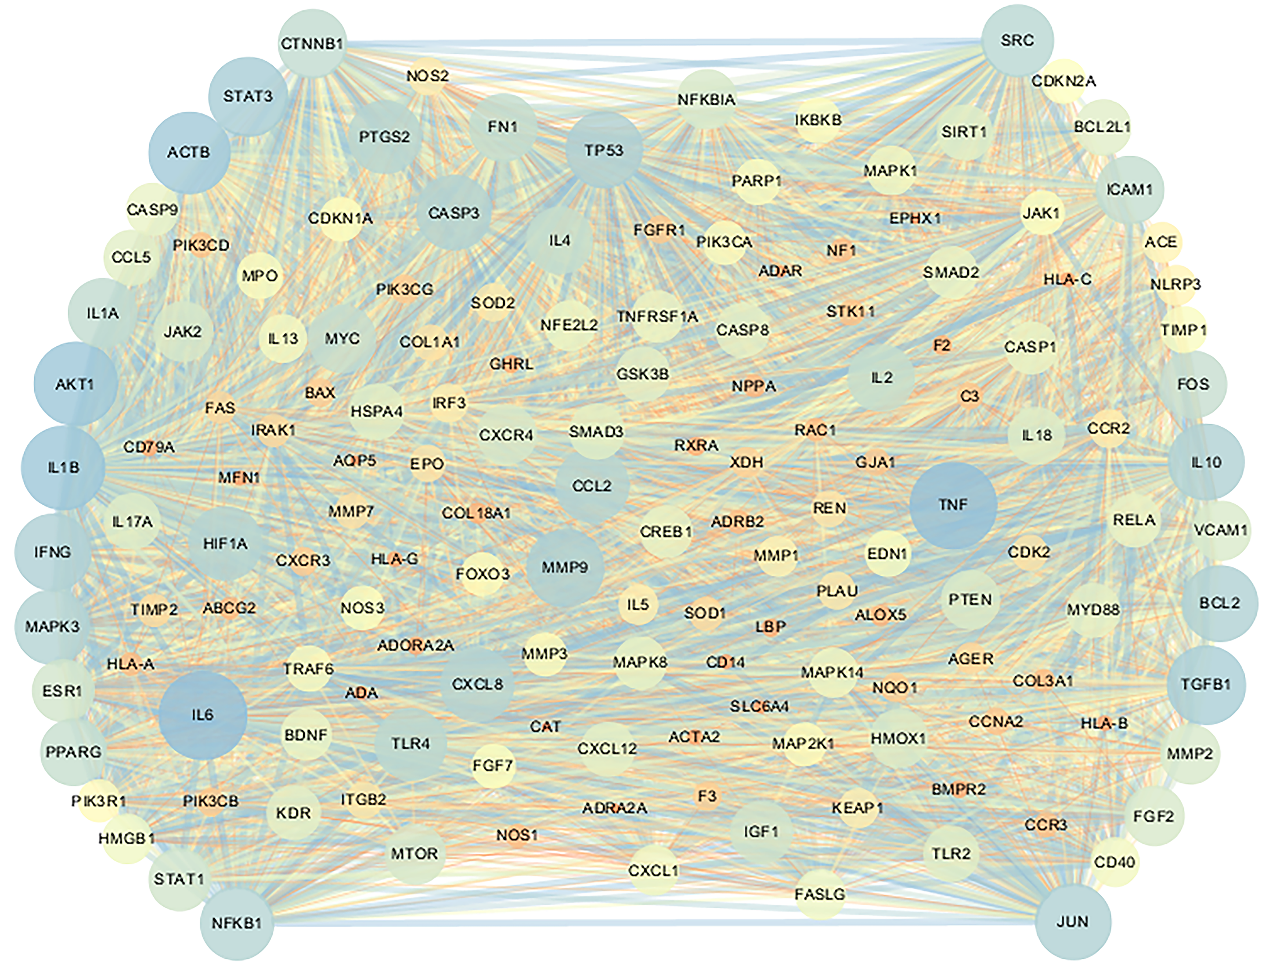
**

**Supplementary Figure S1** The PPI network of 153 overlapping targets.


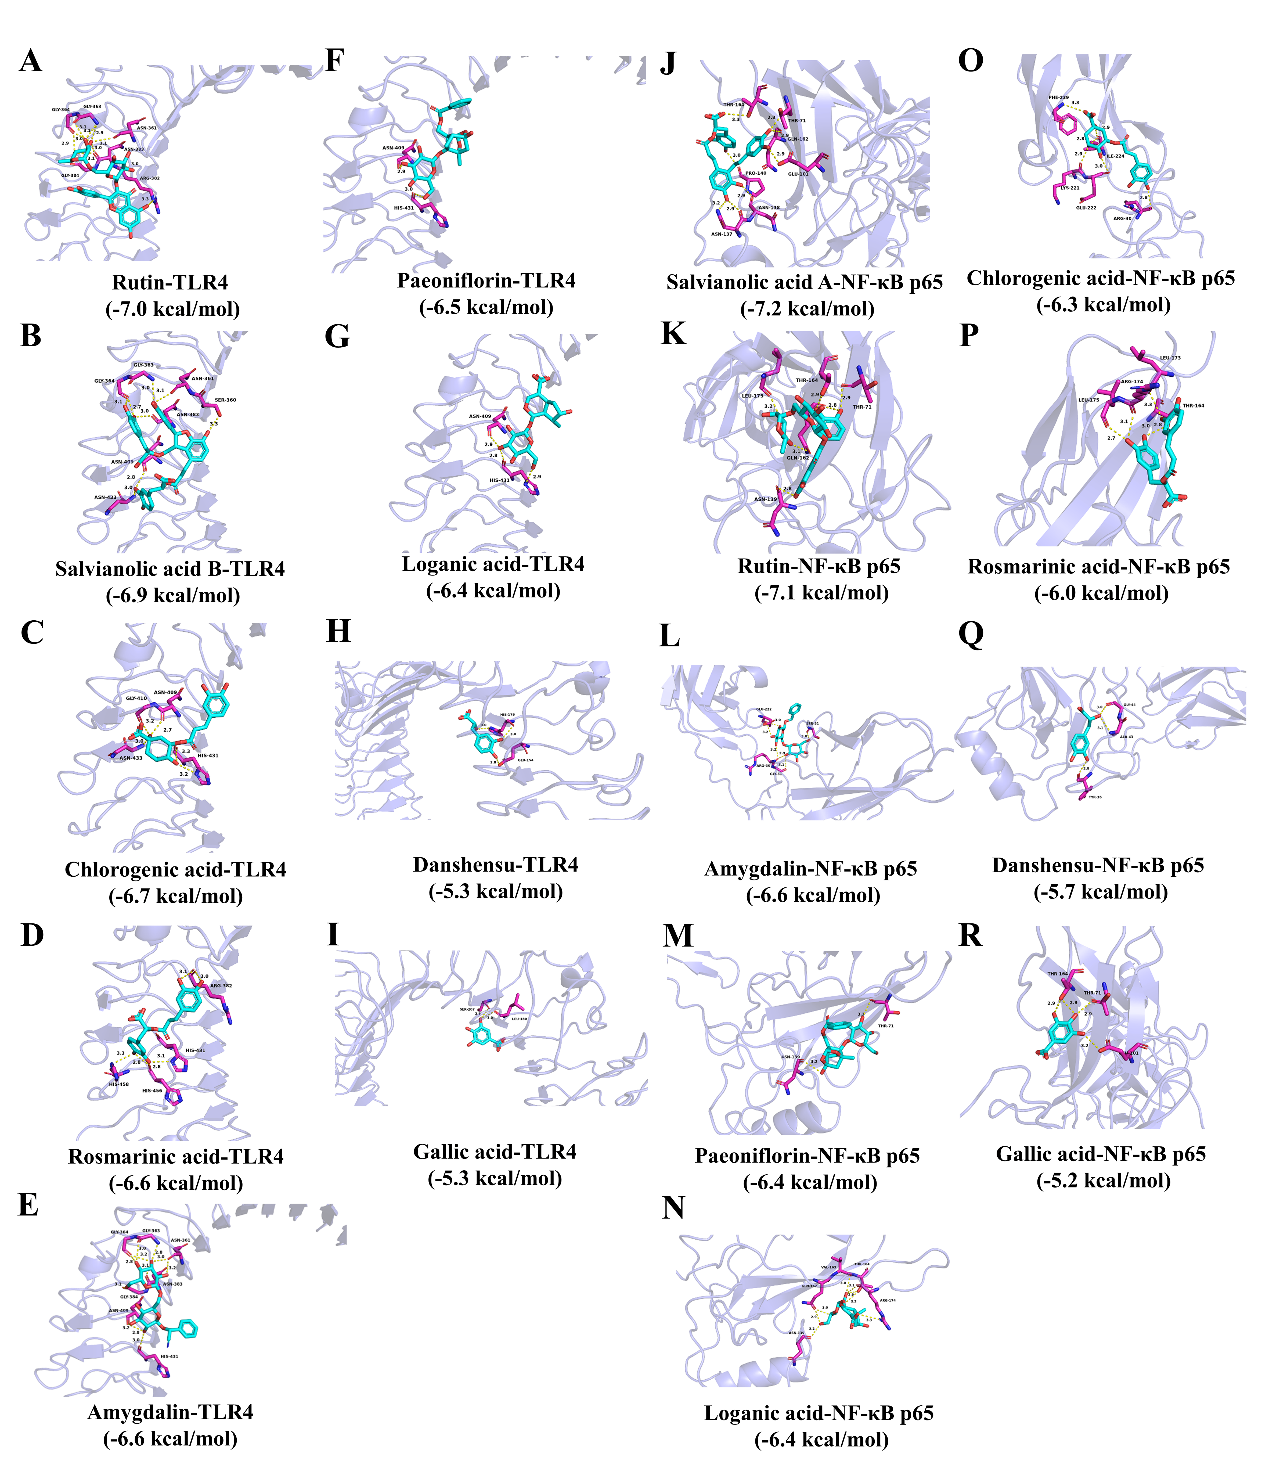


**Supplementary Figure S2** Molecular models of rutin (A), salvianolic acid B (B), chlorogenic acid (C), rosmarinic acid (D), amygdalin (E), paeoniflorin (F), loganic acid (G), danshensu (H), and gallic acid (I) binding to hub protein TLR4. Molecular models of salvianolic acid A (J), rutin (K), amygdalin (L), paeoniflorin (M), loganic acid (N), chlorogenic acid (O), rosmarinic acid (P), danshensu (Q), and gallic acid (R) binding to hub protein NF-κB p65.

**Supplementary Table S1** Composition of Qingfei Huoxue decoction.

| **Latin name** | **Chinese name** | **Weight (g)a** |
| --- | --- | --- |
| *Lonicera japonica* Thunb. | Jinyinhua | 9 |
| *Scutellaria baicalensis* Georgi | Huangqin | 9 |
| *Peucedanum praeruptorum* Dunn | Qianhu | 9 |
| *Prunus mandshurica* (Maxim.) Koehne | Kuxingren | 9 |
| *Angelica sinensis* (Oliv.) Diels | Danggui | 12 |
| *Bupleurum chinense* DC. | Chaihu | 9 |
| *Cyperus rotundus* L. | Xiangfu | 9 |
| *Perilla frutescens* (L.) Britton | Zisugeng | 12 |
| *Coix* *lacryma*-*jobi* *var*. *ma*-*yuen* (Rom. Caill.) Stapf | Yiyiren | 30 |
| *Forsythia suspensa* (Thunb.) Vahl | Lianqiao | 15 |
| *Taraxacum mongolicum* Hand.-Mazz. | Pugongying | 15 |
| *Platycodon grandiflorus* (Jacq.) A. DC. | Jiegeng | 9 |
| *Fritillaria thunbergii* Miq. | Zhebeimu | 9 |
| *Salvia miltiorrhiza* Bunge | Danshen | 12 |
| *Curcuma wenyujin* Y.H.Chen & C.Ling | Yujin | 9 |
| *Aesculus chinensis* Bunge | Suoluoguo | 12 |
| *Citrus reticulata* Blanco | Chenpi | 9 |
| *Paeonia lactiflora* Pall. | Baishao | 15 |

a Weight of each crude drug when administered at the human daily dosage

**Supplementary Table S2** Chemical profiling of major ingredients in QFHXD based on UPLC-Q-TOF-MS/MS.

| NO. | RT (min) | Detected m/z | Error (ppm) | Molecular formula | Identified compound | Type | Source |
| --- | --- | --- | --- | --- | --- | --- | --- |
| 1 | 1.199 | 173.1054 [M-H]- | 5.8 | C6H14N4O2 | Arginine | Amino acids | YYR |
| 2 | 1.320 | 195.0524 [M-H]- | 7.0 | C6H12O7 | Gluconic acid | Organic acids | HQ |
| 3 | 1.449 | 191.0571 [M-H]- | 5.2 | C7H12O6 | Quinic Acid | Organic acids | LQ |
| 4 | 1.480 | 341.1098 [M-H]- | 2.5 | C12H22O11 | Sucrose | Glycosides | HQ, CP |
| 5 | 1.592 | 133.0151 [M-H]- | 6.4 | C4H6O5 | Malic acid | Organic acids | HQ, PGY |
| 6 | 1.830 | 191.0209 [M-H]- | 6.1 | C6H8O7 | Citric acid | Organic acids | DG, CH,  CP, BS |
| 7 | 2.853 | 117.0197 [M-H]- | 3.2 | C4H6O4 | Succinic acid | Organic acids | DS |
| 8 | 2.906 | 243.0626 [M-H]- | 1.4 | C9H12N2O6 | Uridine | Nucleosides | JYH, YYR |
| 9* | 3.436 | 268.1034 [M+H]+ | -2.4 | C10H13N5O4 | Adenosine | Nucleosides | JYH,  KXR,  ZSG, YYR, DG, BS |
| 10 | 3.741 | 282.0848 [M-H]- | 1.4 | C10H13N5O5 | Guanosine | Nucleosides | DG, ZBM |
| 11* | 3.927 | 169.0149 [M-H]- | 3.8 | C7H6O5 | Gallic acid | Phenolic acids | HQ, PGY, BS |
| 12* | 5.861 | 197.0460 [M-H]- | 2.3 | C9H10O5 | Danshensu | Phenolic acids | DS |
| 13* | 7.134 | 375.1307 [M-H]- | 2.7 | C16H24O10 | Loganic acid | Terpenoids | JYH |
| 7.147 | 377.1456 [M+H]+ | 3.7 |
| 14 | 7.322 | 353.0886 [M-H]- | 2.2 | C16H18O9 | Neochlorogenic acid | Phenolic acids | JYH |
| 15 | 7.430 | 203.0834 [M-H]- | 3.9 | C11H12N2O2 | L-tryptophan | Amino acids | DG |
| 16 | 7.674 | 232.1203 [M-H]- | 5.4 | C10H19NO5 | Hopantenic acid | Organic acids | ZBM |
| 7.682 | 234.1319 [M+H]+ | -7.3 |
| 17 | 8.112 | 461.1667 [M-H]- | 0.54 | C20H30O12 | Decaffeoyl-acteoside | Glycosides | JYH |
| 18 | 8.241 | 375.1309 [M-H]- | 3.3 | C16H24O10 | Mussaenosidic acid | Terpenoids | JYH |
| 19 | 8.280 | 543.1203 [M-H]- | 4.6 | C23H28O13S | Paeoniflorin sulfite | Terpenoids | BS |
| 20 | 8.712 | 375.1310 [M-H]- | 3.5 | C16H24O10 | 8-Epiloganic acid | Terpenoids | JYH |
| 21* | 8.963 | 289.0723 [M-H]- | 1.9 | C15H14O6 | (+)-Catechin | Flavonoids | KXR, BS |
| 22 | 9.030 | 389.1105 [M-H]- | 4.0 | C16H22O11 | Secologanoside | Terpenoids | JYH |
| 9.042 | 391.1260 [M+H]+ | 6.4 |
| 23* | 9.139 | 353.0886 [M-H]- | 2.2 | C16H18O9 | Chlorogenic acid | Phenolic acids | JYH, KXR, PGY, DS, YJ |
| 9.152 | 355.1045 [M+H]+ | 6.0 |
| 24 | 9.389 | 353.0888 [M-H]- | 2.8 | C16H18O9 | Cryptochlorogenic acid | Phenolic acids | JYH, JG |
| 25 | 9.498 | 373.1148 [M-H]- | 2.1 | C16H22O10 | Geniposidic acid | Glycosides | DS |
| 26 | 9.503 | 373.1141 [M-H]- | 0.21 | C16H22O10 | Secologanic acid | Terpenoids | JYH |
| 9.508 | 375.1306 [M+H]+ | 5.4 |
| 27* | 9.689 | 456.1522 [M-H]- | 2.3 | C20H27NO11 | Amygdalin | Glycosides | KXR |
| 9.697 | 458.1700 [M+H]+ | 9.4 |
| 28* | 10.582 | 289.0729 [M-H]- | 3.9 | C15H14O6 | Epicatechin | Flavonoids | QH, BS |
| 29 | 10.791 | 593.1524 [M-H]- | 2.0 | C27H30O15 | Kaempferol 3-neohesperidoside | Flavonoids | CP |
| 30 | 10.837 | 403.1257 [M-H]- | 2.8 | C17H24O11 | Secologanoside 7-methyl ester | Terpenoids | JYH |
| 31 | 11.147 | 340.1042 [M+HCOO]- | 1.2 | C14H17NO6 | Prunasin | Glycosides | KXR |
| 32 | 11.335 | 479.1560 [M-H]- | 0.23 | C23H28O11 | Albiflorin | Terpenoids | BS |
| 33 | 11.776 | 405.1421 [M+H]+ | 7.3 | C17H24O11 | Secoxyloganin | Terpenoids | JYH |
| 11.779 | 403.1255 [M-H]- | 2.3 |
| 34* | 11.938 | 479.1566 [M-H]- | 1.5 | C23H28O11 | Paeoniflorin | Terpenoids | BS |
| 35 | 12.895 | 473.0735 [M-H]- | 2.0 | C22H18O12 | Chicoric acid | Phenolic acids | PGY |
| 36 | 12.943 | 623.2004 [M-H]- | 3.6 | C29H36O15 | Forsythoside A | Phenylethanol glycosides | LQ |
| 37 | 13.042 | 755.2433 [M-H]- | 3.8 | C34H44O19 | Forsythoside B | Phenylethanol glycosides | LQ |
| 38* | 13.172 | 609.1487 [M-H]- | 4.3 | C27H30O16 | Rutin | Flavonoids | JYH, CH, XF,  ZSG, LQ, PGY, DS |
| 39 | 13.453 | 623.2003 [M-H]- | 3.5 | C29H36O15 | Forsythoside I | Phenylethanol glycosides | LQ |
| 40 | 13.466 | 547.1487 [M-H]- | 5.5 | C26H28O13 | Chrysin 6-C-arabinoside 8-C-glucoside | Glycosides | HQ |
| 41 | 13.677 | 461.0733 [M-H]- | 1.6 | C21H18O12 | Scutellarin | Flavonoids | HQ |
| 42* | 13.810 | 447.0941 [M-H]- | 1.8 | C21H20O11 | Luteoloside | Flavonoids | JYH, HQ, ZSG, PGY |
| 43 | 13.820 | 623.2007 [M-H]- | 4.1 | C29H36O15 | Verbascoside | Glycosides | LQ |
| 44 | 13.984 | 477.1412 [M-H]- | 2.0 | C23H26O11 | Calceolarioside B | Phenylethanol glycosides | LQ |
| 45 | 14.159 | 547.1478 [M-H]- | 3.8 | C26H28O13 | Chrysin 6-C-glucoside 8-C-arabinoside | Glycosides | HQ |
| 46 | 14.306 | 515.1216 [M-H]- | 4.1 | C25H24O12 | Cynarine | Phenolic acids | JYH |
| 47* | 14.470 | 579.1743 [M-H]- | 4.1 | C27H32O14 | Narirutin | Flavonoids | CP |
| 48 | 14.721 | 515.1213 [M-H]- | 3.5 | C25H24O12 | Isochlorogenic acid A | Phenolic acids | JYH |
| 49 | 14.817 | 519.1893 [M-H]- | 4.1 | C26H32O11 | Pinoresinol 4-O-glucoside | Glycosides | LQ |
| 50 | 15.309 | 757.2595 [M-H]- | 4.6 | C34H46O19 | Centauroside | Terpenoids | JYH |
| 51 | 15.466 | 515.1212 [M-H]- | 3.3 | C25H24O12 | Isochlorogenic acid C | Phenolic acids | JYH |
| 52* | 15.470 | 609.1849 [M-H]- | 4.0 | C28H34O15 | Hesperidin | Flavonoids | QH, LQ, CP |
| 53* | 15.710 | 359.0789 [M-H]- | 4.6 | C18H16O8 | Rosmarinic acid | Phenolic acids | JYH, ZSG, LQ, DS |
| 54 | 15.778 | 432.3516 [M+H]+ | 10.1 | C27H45NO3 | Peimine | Alkaloids | ZBM |
| 55 | 15.917 | 493.1159 [M-H]- | 3.8 | C26H22O10 | Isosalvianolic acid C | Phenolic acids | DS |
| 56 | 15.958 | 479.1568 [M-H]- | 1.9 | C23H28O11 | Albiflorin R1 | Terpenoids | BS |
| 57 | 16.130 | 475.0897 [M-H]- | 3.1 | C22H20O12 | 5,7,2'-Trihydroxy-6-methoxyflavone-7-O-glucuronide | Flavonoids | HQ |
| 58 | 16.451 | 430.3362 [M+H]+ | 10.8 | C27H43NO3 | Peiminine | Alkaloids | ZBM |
| 59* | 16.775 | 717.1492 [M-H]- | 4.3 | C36H30O16 | Salvianolic acid B | Phenolic acids | DS |
| 60* | 17.054 | 445.0789 [M-H]- | 2.9 | C21H18O11 | Baicalin | Flavonoids | HQ |
| 17.063 | 447.0982 [M+H]+ | 13.4 |
| 61 | 17.228 | 505.0997 [M-H]- | 1.9 | C23H22O13 | 2,5,6'-Trihydroxy-7,8-dimethoxyflavone-2'-O-glucuronic acid | Flavonoids | HQ |
| 62 | 17.613 | 717.1505 [M-H]- | 6.1 | C36H30O16 | Salvianolic acid E | Phenolic acids | DS |
| 63 | 17.768 | 447.0946 [M-H]- | 2.9 | C21H20O11 | Dihydrobaicalin | Flavonoids | HQ |
| 64* | 18.041 | 493.1159 [M-H]- | 3.8 | C26H22O10 | Salvianolic acid A | Phenolic acids | DS |
| 65 | 18.165 | 579.2111  [M+HCOO]- | 4.8 | C27H34O11 | Phillyrin | Glycosides | LQ |
| 66 | 18.181 | 445.0810 [M-H]- | 7.6 | C21H18O11 | Glychionide A | Flavonoids | HQ |
| 67 | 18.288 | 731.1642 [M-H]- | 3.3 | C37H32O16 | 4-Methoxysalvianolic acid B | Phenolic acids | DS |
| 68 | 18.486 | 432.3515 [M+H]+ | 9.9 | C27H45NO3 | Isoverticine | Alkaloids | ZBM |
| 69 | 18.589 | 475.0909 [M-H]- | 5.7 | C22H20O12 | Trihydroxymethoxyflavone-7-O-glucuronide | Flavonoids | HQ |
| 70 | 18.696 | 593.1895 [M-H]- | 3.2 | C28H34O14 | Didymin | Flavonoids | CP |
| 71 | 18.712 | 445.0788 [M-H]- | 2.6 | C21H18O11 | Norwogonin-8-O-glucuronide | Flavonoids | HQ |
| 72* | 19.030 | 459.0952 [M-H]- | 4.1 | C22H20O11 | Oroxylin A-7-O-glucuronide | Flavonoids | HQ |
| 73 | 19.202 | 475.0914 [M-H]- | 6.7 | C22H20O12 | Trihydroxymethoxyflavone-O-glucuronide | Flavonoids | HQ |
| 74 | 19.280 | 1237.5574 [M-H]- | 6.4 | C57H90O29 | Platycodin J | Glycosides | JG |
| 75 | 19.411 | 445.0784 [M-H]- | 1.7 | C21H18O11 | Baicalein-6-O-glucuronide isomer | Flavonoids | HQ |
| 76 | 19.523 | 1279.5662 [M-H]- | 4.8 | C59H92O30 | 3″-O-acetylplatycodin J | Glycosides | JG |
| 77 | 19.612 | 1223.5756 [M-H]- | 4.4 | C57H92O28 | Platycodin D | Glycosides | JG |
| 78 | 19.633 | 1427.6400 [M-H]- | 4.5 | C65H104O34 | 3″-O-acetylplatycodin D2 | Glycosides | JG |
| 79 | 19.712 | 459.0957 [M-H]- | 5.2 | C22H20O11 | Wogonoside | Flavonoids | HQ |
| 80 | 19.834 | 1265.5860 [M-H]- | 4.1 | C59H94O29 | Platycodin C | Glycosides | JG |
| 81 | 19.958 | 1237.5546 [M-H]- | 4.1 | C57H90O29 | Platyconic acid A | Glycosides | JG |
| 82 | 20.116 | 1279.5666 [M-H]- | 5.1 | C59H92O30 | 2″-O-acetylplatycodin J | Glycosides | JG |
| 83 | 20.172 | 489.1054 [M-H]- | 3.2 | C23H22O12 | 5,7-Dihydroxy-6,8-dimethoxyflavone-7-O-glucuronide | Flavonoids | HQ |
| 84 | 20.266 | 430.3355 [M+H]+ | 9.1 | C27H43NO3 | Zhebeinone | Alkaloids | ZBM |
| 85 | 20.386 | 1279.5699 [M-H]- | 7.7 | C59H92O30 | 3''-O-acetyl-platyconic acid A | Glycosides | JG |
| 86 | 20.418 | 1427.6395 [M-H]- | 4.1 | C65H104O34 | 2″-O-acetylplatycodin D2 | Glycosides | JG |
| 87 | 20.656 | 1265.5872 [M-H]- | 5.1 | C59H94O29 | Platycodin A | Glycosides | JG |
| 88 | 20.828 | 629.1918 [M-H]- | 6.7 | C31H34O14 | Mudanpioside B | Terpenoids | BS |
| 89 | 20.980 | 1279.5667 [M-H]- | 5.2 | C59H92O30 | 2''-O-acetyl-platyconic acid A | Glycosides | JG |
| 90 | 21.193 | 629.1907 [M-H]- | 5.0 | C31H34O14 | Mudanpioside J | Terpenoids | BS |
| 91 | 22.319 | 269.0466 [M-H]- | 3.9 | C15H10O5 | Baicalein | Flavonoids | HQ |
| 92 | 23.890 | 1129.5494 [M-H]- | 5.1 | C55H86O24 | Escin IA | Glycosides | SLZ |
| 93 | 24.346 | 779.4621 [M-H]- | 4.3 | C42H68O13 | Saikosaponin A | Glycosides | CH |
| 94 | 24.498 | 283.0623 [M-H]- | 3.9 | C16H12O5 | Wogonin | Flavonoids | HQ |
| 95 | 24.751 | 373.0942 [M-H]- | 3.5 | C19H18O8 | Skullcapflavone II | Flavonoids | HQ |
| 96 | 24.943 | 403.1422 [M+H]+ | 8.6 | C21H22O8 | 5,6,7,3',4',5'-Hexamethoxyflavone | Flavonoids | CP |
| 97 | 26.221 | 313.1458 [M-H]- | 4.1 | C19H22O4 | Neocryptotanshinone | Terpenoids | DS |
| 98 | 27.570 | 404.1731 [M+NH4]+ | 6.7 | C21H22O7 | Peucedanocoumarin III | Coumarins | QH |
| 99 | 27.745 | 404.1737 [M+NH4]+ | 8.2 | C21H22O7 | Praeruptorin A | Coumarins | QH |

*The identity was confirmed by comparing the RT, MS/MS data with those of the reference substances. JYH: *Lonicera japonica* Thunb. (Jinyinhua), HQ: *Scutellaria baicalensis* Georgi (Huangqin), QH: *Peucedanum praeruptorum* Dunn (Qianhu), KXR: *Prunus mandshurica* (Maxim.) Koehne (Kuxingren), DG: *Angelica sinensis* (Oliv.) Diels (Danggui), CH: *Bupleurum chinense* DC. (Chaihu), XF: *Cyperus rotundus* L. (Xiangfu), ZSG: *Perilla frutescens* (L.) Britton (Zisugeng), YYR: *Coix* *lacryma*-*jobi* *var*. *ma*-*yuen* (Rom. Caill.) Stapf (Yiyiren), LQ: *Forsythia suspensa* (Thunb.) Vahl (Lianqiao), PGY: *Taraxacum mongolicum* Hand.-Mazz. (Pugongying), JG: *Platycodon grandiflorus* (Jacq.) A. DC. (Jiegeng), ZBM: *Fritillaria thunbergii* Miq. (Zhebeimu), DS: *Salvia miltiorrhiza* Bunge (Danshen), YJ: *Curcuma wenyujin* Y.H.Chen & C.Ling (Yujin), SLZ: *Aesculus chinensis* Bunge (Suoluoguo), CP: *Citrus reticulata* Blanco (Chenpi), BS: *Paeonia lactiflora* Pall. (Baishao).

**Supplementary Table S3** The information of 153 overlapping targets determined by overlapping two datasets of disease-target and component-target networks.

| **The information of 153 overlapping genes** | | | | | | | | | |
| --- | --- | --- | --- | --- | --- | --- | --- | --- | --- |
| ACTA2 | HIF1A | SLC6A4 | ICAM1 | ADRA2A | RXRA | NFKB1 | XDH | PIK3CG | IGF1 |
| ACTB | HLA-A | TNF | IFNG | COL1A1 | GSK3B | SOD2 | IL2 | PIK3R1 | AQP5 |
| ADA | HLA-B | VEGFA | MYD88 | COL3A1 | CCNA2 | STK11 | IL1A | PTEN | FGFR1 |
| ADAR | HLA-C | GHRL | BCL2 | NF1 | KEAP1 | HSPA4 | ABCG2 | MYC | CCR3 |
| ADORA2A | HLA-G | FASLG | BAX | NPPA | CCR2 | LBP | CXCL1 | CTNNB1 | C3 |
| ADRB2 | HMOX1 | CASP9 | AKT1 | PLAU | ESR1 | CD14 | MPO | BDNF | TIMP2 |
| CASP1 | IL6 | EPHX1 | CCL2 | SOD1 | F2 | IL5 | ALOX5 | KDR | BMPR2 |
| CASP3 | CXCL8 | NFE2L2 | SIRT1 | TGFB1 | PPARG | CXCR3 | ITGB2 | CXCL12 | AGER |
| CD79A | IL10 | NOS2 | STAT3 | CDK2 | NQO1 | VCAM1 | TRAF6 | BCL2L1 | FOXO3 |
| CREB1 | IL13 | MAPK1 | IL4 | TLR2 | MMP3 | TNFRSF1A | IL18 | JAK1 |  |
| EDN1 | MMP1 | TP53 | TIMP1 | MAPK3 | HMGB1 | CCL5 | CASP8 | CDKN2A |  |
| EPO | MMP9 | PTGS2 | MMP2 | MAP2K1 | NFKBIA | FGF2 | MFN1 | CDKN1A |  |
| F3 | NOS1 | IL1B | CXCR4 | MTOR | IL17A | IRAK1 | PARP1 | MMP7 |  |
| FGF7 | NOS3 | MAPK14 | FAS | IKBKB | JUN | IRF3 | PIK3CA | GJA1 |  |
| FN1 | RAC1 | MAPK8 | TLR4 | JAK2 | SMAD2 | STAT1 | PIK3CB | SRC |  |
| FOS | REN | RELA | NLRP3 | CAT | SMAD3 | ACE | PIK3CD | CD40 |  |

**Supplementary Table S4** Top 20 nodes ranked by Degree method.

| **Rank** | **Name** | **Score** |
| --- | --- | --- |
| 1 | CASP3 | 89 |
| 1 | JUN | 89 |
| 1 | ACTB | 89 |
| 1 | IL6 | 89 |
| 1 | TGFB1 | 89 |
| 1 | TNF | 89 |
| 1 | NFKB1 | 89 |
| 1 | IFNG | 89 |
| 1 | IL1B | 89 |
| 1 | STAT3 | 89 |
| 1 | TP53 | 89 |
| 12 | CXCL8 | 88 |
| 12 | MMP9 | 88 |
| 12 | BCL2 | 88 |
| 12 | HIF1A | 88 |
| 12 | AKT1 | 88 |
| 17 | PTGS2 | 87 |
| 17 | MAPK3 | 87 |
| 19 | SRC | 86 |
| 19 | TLR4 | 86 |

**Supplementary Table S5** Top 20 nodes ranked by DMNC method.

| **Rank** | **Name** | **Score** |
| --- | --- | --- |
| 1 | BCL2L1 | 1.61137874 |
| 2 | MYD88 | 1.604700763 |
| 3 | RELA | 1.60274119 |
| 4 | STAT1 | 1.60269941 |
| 5 | MTOR | 1.600975115 |
| 6 | CASP8 | 1.599692673 |
| 7 | PTEN | 1.599420135 |
| 8 | CREB1 | 1.598738549 |
| 9 | FOS | 1.596735029 |
| 10 | JAK2 | 1.596723663 |
| 11 | ESR1 | 1.595507649 |
| 12 | MAPK14 | 1.595137715 |
| 13 | IL4 | 1.594900151 |
| 14 | HSPA4 | 1.594262553 |
| 15 | IL17A | 1.591301791 |
| 16 | IL2 | 1.590912901 |
| 17 | CXCR4 | 1.589954285 |
| 18 | CASP9 | 1.589942285 |
| 19 | IL1A | 1.589597238 |
| 20 | MAPK8 | 1.589152847 |
